# Supplementary material for: Green sweet potato leaves increase Nrf2-mediated antioxidant activity and facilitate benzo[a]pyrene metabolism in the liver by increasing phase II detoxifying enzyme activities in rats
Source: Royal Society of Chemistry journal article supplement (doi:10.1039/d2fo01049f), 2022-01-01
Supplement: d2fo01049f1.pdf [file d2fo01049f1.pdf]

Supplementary 1. Changes of body weight and tissue weights in rats.

|                            | Control    | B[a]P      | B[a]P+<br>PSPL | B[a]P+<br>GSPL |
|----------------------------|------------|------------|----------------|----------------|
| Body weight(g)             | 305.5±16.3 | 318.8±11.2 | 300±9.5        | 295±13.6       |
| Liver weight(g)            | 10.3±1     | 11.8±0.9   | 11.4±0.9       | 10.8±0.7       |
| Relative liver weight (%)  | 3.4±0.2    | 3.7±0.2    | 3.8±0.3        | 3.7±0.07       |
| Lung weight (g)            | 1.6±0.1    | 2.1±0.6    | 1.8±0.3        | 1.4±0.3        |
| Relative lung weight (%)   | 0.5±0.1    | 0.7±0.2    | 0.6±0.1        | 0.5±0.1        |
| Kidney weight (g)          | 2.5±0.1    | 2.9±0.2    | 2.6±0.1        | 2.5±0.1        |
| Relative kidney weight (%) | 0.8±0.01   | 0.9±0.1    | 0.7±0.01       | 0.8±0.04       |

Values are the mean±SD, n=5.
