# Supplementary material for: Green sweet potato leaves increase Nrf2-mediated antioxidant activity and facilitate benzo[a]pyrene metabolism in the liver by increasing phase II detoxifying enzyme activities in rats
Source: Royal Society of Chemistry journal article supplement (doi:10.1039/d2fo01049f), 2022-01-01
Supplement: d2fo01049f2.pdf [file d2fo01049f2.pdf]

## Supplementary 2

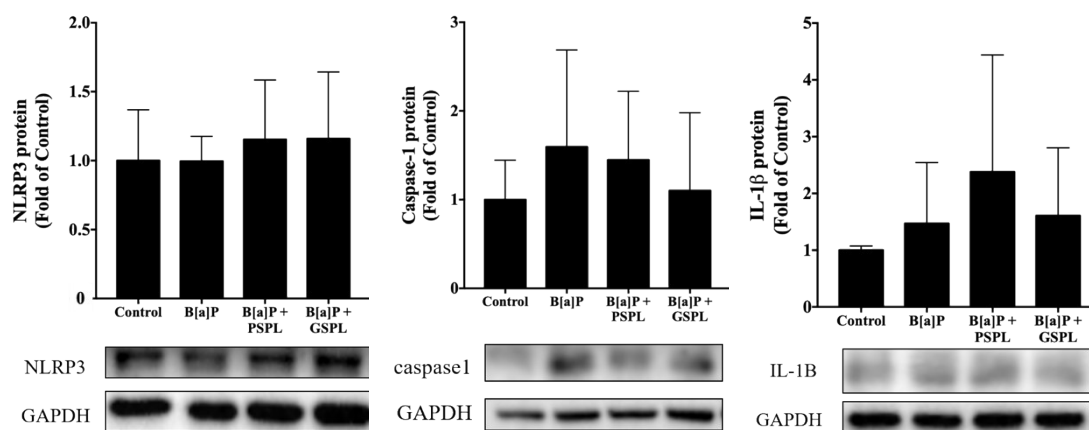

**Sup2.** NLRP3 (a), Caspase-1 (b), and IL-1 $\beta$  (c) proteins in liver homogenate. PSPL: purple sweet potato leaves; GSPL: green sweet potato leaves. B[a]P: benzo[a]pyrene.

Markers of inflammation including NLRP3, Caspase-1, and IL-1 $\beta$  protein expressions were shown in supplementary data 1. Furthermore, a low dose of B[a]P treatment had no effect on the protein expressions of NLRP3, caspase-1 and IL-1 $\beta$  in the liver. These results indicate that a single low dose of B[a]P treatment had no effect on NLRP3 inflammasome activation. Both SPLs supplementation also caused no change on these proteins in liver homogenate.
